# Supplementary material
Source: PubMed Central journal article supplement (PMC4609718)

## SUPPLEMENTAL MATERIAL

### Sequences

FASTA files containing the sequences of the alleles determined in this study and used to construct the trees presented and the supplementary tables S1 and S2 can be found at: <http://dx.doi.org/10.6084/m9.figshare.1463318>

**Table S1** - ST, and allelic profiles and cluster on the ME tree of representative strains previously published. One strain of each profile was selected. Type strains are in bold.

| Key                          | ID                                                       | ST        | map       | pfl       | ppac      | pyk       | rpoB      | sodA      | tuf       | Cluster <sup>a</sup> |
|------------------------------|----------------------------------------------------------|-----------|-----------|-----------|-----------|-----------|-----------|-----------|-----------|----------------------|
| SK443                        | <i>S. anginosus</i> genomosubspecies AJ1                 | 1         | 10        | 24        | 26        | 29        | 12        | 39        | 21        | G                    |
| CCUG 35181                   | <i>S. anginosus</i> genomosubspecies AJ1                 | 39        | 15        | 15        | 25        | 25        | 11        | 17        | 7         | G                    |
| CCUG 52051                   | <i>S. anginosus</i> genomosubspecies AJ1                 | 75        | 8         | 4         | 36        | 27        | 18        | 39        | 20        | G                    |
| SK534                        | <i>S. anginosus</i> subsp. <i>anginosus</i>              | 2         | 11        | 12        | 21        | 5         | 13        | 13        | 5         | G                    |
| CCUG 28192                   | <i>S. anginosus</i> subsp. <i>anginosus</i>              | 5         | 13        | 15        | 33        | 28        | 23        | 25        | 6         | G                    |
| SK1393                       | <i>S. anginosus</i> subsp. <i>anginosus</i>              | 6         | 13        | 16        | 33        | 22        | 17        | 14        | 2         | G                    |
| <b>DSM 20563<sup>T</sup></b> | <b><i>S. anginosus</i> subsp. <i>anginosus</i></b>       | <b>7</b>  | <b>13</b> | <b>5</b>  | <b>21</b> | <b>5</b>  | <b>26</b> | <b>21</b> | <b>17</b> | <b>G</b>             |
| CCUG 11668                   | <i>S. anginosus</i> subsp. <i>anginosus</i>              | 55        | 2         | 11        | 39        | 23        | 33        | 28        | 2         | G                    |
| CO1                          | <i>S. anginosus</i> subsp. <i>anginosus</i>              | 56        | 21        | 14        | 40        | 33        | 16        | 22        | 19        | G                    |
| CO2                          | <i>S. anginosus</i> subsp. <i>anginosus</i>              | 57        | 21        | 14        | 9         | 33        | 16        | 22        | 19        | G                    |
| CCUG 28195                   | <i>S. anginosus</i> subsp. <i>anginosus</i>              | 58        | 2         | 18        | 22        | 19        | 2         | 22        | 2         | G                    |
| SK1428                       | <i>S. anginosus</i> subsp. <i>anginosus</i>              | 59        | 2         | 18        | 40        | 23        | 17        | 10        | 15        | G                    |
| SK1396                       | <i>S. anginosus</i> subsp. <i>anginosus</i>              | 60        | 2         | 21        | 35        | 23        | 5         | 16        | 4         | G                    |
| SK1401                       | <i>S. anginosus</i> subsp. <i>anginosus</i>              | 61        | 2         | 21        | 35        | 23        | 5         | 31        | 4         | G                    |
| SK1402                       | <i>S. anginosus</i> subsp. <i>anginosus</i>              | 62        | 2         | 29        | 19        | 22        | 20        | 32        | 3         | G                    |
| SK1106                       | <i>S. anginosus</i> subsp. <i>anginosus</i>              | 63        | 2         | 29        | 20        | 33        | 9         | 31        | 2         | G                    |
| CCUG 34338                   | <i>S. anginosus</i> subsp. <i>anginosus</i>              | 64        | 2         | 29        | 39        | 23        | 33        | 28        | 2         | G                    |
| SK1099                       | <i>S. anginosus</i> subsp. <i>anginosus</i>              | 65        | 2         | 7         | 19        | 22        | 20        | 18        | 3         | G                    |
| SK1138                       | <i>S. anginosus</i> subsp. <i>anginosus</i>              | 74        | 8         | 18        | 10        | 33        | 1         | 39        | 16        | G                    |
| SK1390                       | <i>S. anginosus</i> subsp. <i>anginosus</i>              | 76        | 8         | 8         | 10        | 33        | 1         | 39        | 16        | G                    |
| CCUG 32852                   | <i>S. anginosus</i> subsp. <i>anginosus</i>              | 77        | 9         | 29        | 39        | 16        | 9         | 22        | 2         | G                    |
| SK1102                       | <i>S. anginosus</i> subsp. <i>anginosus</i>              | 78        | 9         | 29        | 39        | 23        | 9         | 22        | 2         | G                    |
| SK1340                       | <i>S. anginosus</i> subsp. <i>whileyi</i>                | 3         | 12        | 30        | 3         | 3         | 27        | 4         | 5         | F                    |
| SK1366                       | <i>S. anginosus</i> subsp. <i>whileyi</i>                | 21        | 14        | 30        | 11        | 3         | 27        | 4         | 5         | F                    |
| MAS 624                      | <i>S. anginosus</i> subsp. <i>whileyi</i>                | 22        | 14        | 30        | 15        | 3         | 27        | 4         | 5         | F                    |
| SK1345                       | <i>S. anginosus</i> subsp. <i>whileyi</i>                | 23        | 14        | 30        | 18        | 3         | 27        | 4         | 5         | F                    |
| CO3B                         | <i>S. anginosus</i> subsp. <i>whileyi</i>                | 24        | 14        | 30        | 18        | 6         | 27        | 4         | 5         | F                    |
| SK1350                       | <i>S. anginosus</i> subsp. <i>whileyi</i>                | 25        | 14        | 30        | 28        | 3         | 10        | 4         | 5         | F                    |
| SK1319                       | <i>S. anginosus</i> subsp. <i>whileyi</i>                | 26        | 14        | 30        | 28        | 3         | 27        | 4         | 5         | F                    |
| <b>DSM 25818<sup>T</sup></b> | <b><i>S. anginosus</i> subsp. <i>whileyi</i></b>         | <b>27</b> | <b>14</b> | <b>30</b> | <b>3</b>  | <b>3</b>  | <b>27</b> | <b>4</b>  | <b>5</b>  | <b>F</b>             |
| CO4B                         | <i>S. anginosus</i> subsp. <i>whileyi</i>                | 32        | 14        | 30        | 5         | 3         | 10        | 4         | 5         | F                    |
| SK1334                       | <i>S. anginosus</i> subsp. <i>whileyi</i>                | 36        | 14        | 3         | 18        | 3         | 27        | 4         | 5         | F                    |
| SK1357                       | <i>S. anginosus</i> subsp. <i>whileyi</i>                | 37        | 14        | 3         | 28        | 3         | 27        | 4         | 5         | F                    |
| SK457                        | <i>S. constellatus</i> subsp. <i>constellatus</i>        | 8         | 14        | 15        | 8         | 32        | 24        | 30        | 10        | A                    |
| SK551                        | <i>S. constellatus</i> subsp. <i>constellatus</i>        | 9         | 14        | 15        | 8         | 32        | 32        | 29        | 10        | A                    |
| SK1414                       | <i>S. constellatus</i> subsp. <i>constellatus</i>        | 10        | 14        | 23        | 37        | 32        | 25        | 9         | 8         | A                    |
| SK1315                       | <i>S. constellatus</i> subsp. <i>constellatus</i>        | 11        | 14        | 26        | 41        | 32        | 15        | 24        | 8         | A                    |
| SK535                        | <i>S. constellatus</i> subsp. <i>constellatus</i>        | 12        | 14        | 27        | 12        | 10        | 25        | 7         | 13        | A                    |
| SK1424                       | <i>S. constellatus</i> subsp. <i>constellatus</i>        | 13        | 14        | 27        | 1         | 32        | 32        | 27        | 10        | A                    |
| CCUG 28199                   | <i>S. constellatus</i> subsp. <i>constellatus</i>        | 14        | 14        | 27        | 14        | 8         | 22        | 8         | 8         | A                    |
| <b>DSM 20575<sup>T</sup></b> | <b><i>S. constellatus</i> subsp. <i>constellatus</i></b> | <b>18</b> | <b>14</b> | <b>27</b> | <b>30</b> | <b>14</b> | <b>25</b> | <b>7</b>  | <b>10</b> | <b>A</b>             |
| CCUG 33199                   | <i>S. constellatus</i> subsp. <i>constellatus</i>        | 20        | 14        | 30        | 11        | 17        | 32        | 29        | 10        | A                    |
| SK1422                       | <i>S. constellatus</i> subsp. <i>constellatus</i>        | 34        | 14        | 30        | 8         | 10        | 32        | 34        | 10        | B                    |
| SK512                        | <i>S. constellatus</i> subsp. <i>constellatus</i>        | 35        | 14        | 30        | 8         | 32        | 32        | 2         | 10        | A                    |
| CCUG 9569                    | <i>S. constellatus</i> subsp. <i>constellatus</i>        | 38        | 14        | 6         | 4         | 21        | 25        | 30        | 2         | A                    |
| CCUG 4215                    | <i>S. constellatus</i> subsp. <i>constellatus</i>        | 40        | 15        | 20        | 1         | 13        | 14        | 5         | 10        | A                    |
| CCUG 33235                   | <i>S. constellatus</i> subsp. <i>constellatus</i>        | 41        | 15        | 27        | 8         | 9         | 25        | 26        | 10        | A                    |
| CCUG 55196                   | <i>S. constellatus</i> subsp. <i>constellatus</i>        | 42        | 15        | 30        | 32        | 8         | 25        | 37        | 13        | A                    |
| SK1429                       | <i>S. constellatus</i> subsp. <i>constellatus</i>        | 45        | 17        | 19        | 8         | 9         | 3         | 37        | 1         | A                    |

|                              |                                                         |           |           |           |           |           |           |           |           |          |
|------------------------------|---------------------------------------------------------|-----------|-----------|-----------|-----------|-----------|-----------|-----------|-----------|----------|
| SK464                        | <i>S. constellatus</i> subsp. <i>constellatus</i>       | 46        | 18        | 1         | 17        | 31        | 19        | 37        | 10        | A        |
| SK439                        | <i>S. constellatus</i> subsp. <i>constellatus</i>       | 47        | 18        | 20        | 24        | 10        | 19        | 35        | 10        | B        |
| SK524                        | <i>S. constellatus</i> subsp. <i>constellatus</i>       | 48        | 19        | 20        | 13        | 31        | 19        | 35        | 9         | B        |
| SK1403                       | <i>S. constellatus</i> subsp. <i>constellatus</i>       | 49        | 19        | 20        | 6         | 31        | 19        | 35        | 10        | B        |
| SK518                        | <i>S. constellatus</i> subsp. <i>constellatus</i>       | 50        | 19        | 27        | 34        | 31        | 19        | 35        | 10        | B        |
| CCUG 28467                   | <i>S. constellatus</i> subsp. <i>constellatus</i>       | 68        | 5         | 30        | 32        | 9         | 21        | 11        | 8         | A        |
| SK455                        | <i>S. constellatus</i> subsp. <i>constellatus</i>       | 69        | 6         | 27        | 42        | 32        | 25        | 3         | 13        | A        |
| SK1417                       | <i>S. constellatus</i> subsp. <i>constellatus</i>       | 70        | 7         | 17        | 8         | 32        | 29        | 15        | 10        | A        |
| SK498                        | <i>S. constellatus</i> subsp. <i>constellatus</i>       | 71        | 7         | 27        | 29        | 26        | 28        | 11        | 23        | A        |
| SK1091                       | <i>S. constellatus</i> subsp. <i>constellatus</i>       | 72        | 7         | 27        | 8         | 34        | 29        | 19        | 10        | A        |
| CCUG 36736                   | <i>S. constellatus</i> subsp. <i>constellatus</i>       | 73        | 7         | 30        | 8         | 4         | 7         | 6         | 10        | A        |
| CCUG 38579                   | <i>S. constellatus</i> subsp. <i>pharyngis</i>          | 15        | 14        | 27        | 16        | 32        | 25        | 36        | 17        | C        |
| <b>DSM 17475<sup>T</sup></b> | <b><i>S. constellatus</i> subsp. <i>pharyngis</i></b>   | <b>16</b> | <b>14</b> | <b>27</b> | <b>16</b> | <b>32</b> | <b>25</b> | <b>37</b> | <b>17</b> | <b>C</b> |
| SK1327                       | <i>S. constellatus</i> subsp. <i>pharyngis</i>          | 17        | 14        | 27        | 16        | 32        | 29        | 37        | 17        | C        |
| CCUG 48768                   | <i>S. constellatus</i> subsp. <i>pharyngis</i>          | 66        | 3         | 27        | 16        | 32        | 25        | 37        | 17        | C        |
| SK1349                       | <i>S. constellatus</i> subsp. <i>viborgensis</i>        | 19        | 14        | 27        | 38        | 32        | 25        | 20        | 17        | E        |
| SK1375                       | <i>S. constellatus</i> subsp. <i>viborgensis</i>        | 28        | 14        | 30        | 38        | 15        | 25        | 20        | 17        | E        |
| SK1364                       | <i>S. constellatus</i> subsp. <i>viborgensis</i>        | 29        | 14        | 30        | 38        | 18        | 25        | 20        | 17        | E        |
| SK1360                       | <i>S. constellatus</i> subsp. <i>viborgensis</i>        | 30        | 14        | 30        | 38        | 2         | 25        | 20        | 5         | E        |
| <b>DSM 25819<sup>T</sup></b> | <b><i>S. constellatus</i> subsp. <i>viborgensis</i></b> | <b>31</b> | <b>14</b> | <b>30</b> | <b>38</b> | <b>32</b> | <b>25</b> | <b>20</b> | <b>17</b> | <b>E</b> |
| SK1342                       | <i>S. constellatus</i> subsp. <i>viborgensis</i>        | 33        | 14        | 30        | 7         | 2         | 25        | 20        | 17        | E        |
| <b>DSM 20573<sup>T</sup></b> | <b><i>S. intermedius</i></b>                            | <b>4</b>  | <b>1</b>  | <b>28</b> | <b>27</b> | <b>30</b> | <b>8</b>  | <b>23</b> | <b>14</b> | <b>H</b> |
| SK1427                       | <i>S. intermedius</i>                                   | 43        | 16        | 9         | 27        | 12        | 4         | 33        | 11        | H        |
| CCUG 28760                   | <i>S. intermedius</i>                                   | 44        | 16        | 9         | 27        | 20        | 4         | 33        | 22        | H        |
| SK1110                       | <i>S. intermedius</i>                                   | 51        | 20        | 10        | 31        | 7         | 31        | 12        | 12        | H        |
| SK511                        | <i>S. intermedius</i>                                   | 52        | 20        | 13        | 23        | 11        | 31        | 1         | 22        | H        |
| SK478                        | <i>S. intermedius</i>                                   | 53        | 20        | 2         | 2         | 11        | 31        | 12        | 12        | H        |
| CCUG 28203                   | <i>S. intermedius</i>                                   | 54        | 20        | 25        | 27        | 24        | 6         | 38        | 18        | H        |
| CCUG 11578                   | <i>S. intermedius</i>                                   | 67        | 4         | 22        | 27        | 1         | 30        | 12        | 12        | H        |

<sup>a</sup> - The clusters were given arbitrary letters (see figure 1).

**Table S2** - Study isolates STs, allelic profiles and cluster on the minimal evolution tree.

| Key     | MLSA ID                                     | ST | map | pfl | ppac | pyk | rpoB | sodA | tuf | Cluster <sup>a</sup> |
|---------|---------------------------------------------|----|-----|-----|------|-----|------|------|-----|----------------------|
| SH1888  | <i>S. anginosus</i> subsp. <i>anginosus</i> | 1  | 10  | 24  | 26   | 29  | 12   | 39   | 21  | G                    |
| SH1602  | <i>S. anginosus</i> subsp. <i>anginosus</i> | 5  | 13  | 15  | 33   | 28  | 23   | 25   | 6   | G                    |
| SH1832  | <i>S. anginosus</i> subsp. <i>anginosus</i> | 56 | 21  | 14  | 40   | 33  | 16   | 22   | 19  | G                    |
| SH1835  | <i>S. anginosus</i> subsp. <i>anginosus</i> | 56 | 21  | 14  | 40   | 33  | 16   | 22   | 19  | G                    |
| SH1870B | <i>S. anginosus</i> subsp. <i>anginosus</i> | 56 | 21  | 14  | 40   | 33  | 16   | 22   | 19  | G                    |
| SH2364  | <i>S. anginosus</i> subsp. <i>anginosus</i> | 56 | 21  | 14  | 40   | 33  | 16   | 22   | 19  | G                    |
| SH3427  | <i>S. anginosus</i> subsp. <i>anginosus</i> | 56 | 21  | 14  | 40   | 33  | 16   | 22   | 19  | G                    |
| SH4789  | <i>S. anginosus</i> subsp. <i>anginosus</i> | 56 | 21  | 14  | 40   | 33  | 16   | 22   | 19  | G                    |
| SH1803  | <i>S. anginosus</i> subsp. <i>anginosus</i> | 58 | 2   | 18  | 22   | 19  | 2    | 22   | 2   | G                    |
| SH1808  | <i>S. anginosus</i> subsp. <i>anginosus</i> | 58 | 2   | 18  | 22   | 19  | 2    | 22   | 2   | G                    |
| SH1877  | <i>S. anginosus</i> subsp. <i>anginosus</i> | 58 | 2   | 18  | 22   | 19  | 2    | 22   | 2   | G                    |
| SH4314  | <i>S. anginosus</i> subsp. <i>anginosus</i> | 58 | 2   | 18  | 22   | 19  | 2    | 22   | 2   | G                    |
| SH6185  | <i>S. anginosus</i> subsp. <i>anginosus</i> | 58 | 2   | 18  | 22   | 19  | 2    | 22   | 2   | G                    |
| SH1733  | <i>S. anginosus</i> subsp. <i>anginosus</i> | 61 | 2   | 21  | 35   | 23  | 5    | 31   | 4   | G                    |
| SH1878  | <i>S. anginosus</i> subsp. <i>anginosus</i> | 61 | 2   | 21  | 35   | 23  | 5    | 31   | 4   | G                    |
| SH2173  | <i>S. anginosus</i> subsp. <i>anginosus</i> | 64 | 2   | 29  | 39   | 23  | 33   | 28   | 2   | G                    |
| SH1573  | <i>S. anginosus</i> subsp. <i>anginosus</i> | 78 | 9   | 29  | 39   | 23  | 9    | 22   | 2   | G                    |
| SH1582  | <i>S. anginosus</i> subsp. <i>anginosus</i> | 78 | 9   | 29  | 39   | 23  | 9    | 22   | 2   | G                    |
| SH1616  | <i>S. anginosus</i> subsp. <i>anginosus</i> | 78 | 9   | 29  | 39   | 23  | 9    | 22   | 2   | G                    |
| SH1626  | <i>S. anginosus</i> subsp. <i>anginosus</i> | 78 | 9   | 29  | 39   | 23  | 9    | 22   | 2   | G                    |
| SH1629  | <i>S. anginosus</i> subsp. <i>anginosus</i> | 78 | 9   | 29  | 39   | 23  | 9    | 22   | 2   | G                    |
| SH1787  | <i>S. anginosus</i> subsp. <i>anginosus</i> | 78 | 9   | 29  | 39   | 23  | 9    | 22   | 2   | G                    |
| SH1887  | <i>S. anginosus</i> subsp. <i>anginosus</i> | 78 | 9   | 29  | 39   | 23  | 9    | 22   | 2   | G                    |
| SH3417  | <i>S. anginosus</i> subsp. <i>anginosus</i> | 78 | 9   | 29  | 39   | 23  | 9    | 22   | 2   | G                    |
| SH3422  | <i>S. anginosus</i> subsp. <i>anginosus</i> | 78 | 9   | 29  | 39   | 23  | 9    | 22   | 2   | G                    |
| SH4259  | <i>S. anginosus</i> subsp. <i>anginosus</i> | 78 | 9   | 29  | 39   | 23  | 9    | 22   | 2   | G                    |
| SH4295  | <i>S. anginosus</i> subsp. <i>anginosus</i> | 78 | 9   | 29  | 39   | 23  | 9    | 22   | 2   | G                    |
| SH5761  | <i>S. anginosus</i> subsp. <i>anginosus</i> | 78 | 9   | 29  | 39   | 23  | 9    | 22   | 2   | G                    |
| SH6028  | <i>S. anginosus</i> subsp. <i>anginosus</i> | 78 | 9   | 29  | 39   | 23  | 9    | 22   | 2   | G                    |
| SH1384  | <i>S. anginosus</i> subsp. <i>anginosus</i> | 82 | 11  | 12  | 21   | 5   | 35   | 13   | 5   | G                    |
| SH1555  | <i>S. anginosus</i> subsp. <i>anginosus</i> | 84 | 13  | 33  | 33   | 22  | 36   | 14   | 6   | G                    |

|         |                                             |     |    |    |    |    |    |    |    |         |
|---------|---------------------------------------------|-----|----|----|----|----|----|----|----|---------|
| SH5333  | <i>S. anginosus</i> subsp. <i>anginosus</i> | 84  | 13 | 33 | 33 | 22 | 36 | 14 | 6  | G       |
| SH1560  | <i>S. anginosus</i> subsp. <i>anginosus</i> | 85  | 23 | 21 | 45 | 33 | 2  | 42 | 3  | G       |
| SH1780  | <i>S. anginosus</i> subsp. <i>anginosus</i> | 85  | 23 | 21 | 45 | 33 | 2  | 42 | 3  | G       |
| SH1579  | <i>S. anginosus</i> subsp. <i>anginosus</i> | 87  | 9  | 29 | 3  | 23 | 9  | 22 | 2  | G       |
| SH1590  | <i>S. anginosus</i> subsp. <i>anginosus</i> | 88  | 13 | 34 | 47 | 33 | 37 | 43 | 25 | G       |
| SH1594  | <i>S. anginosus</i> subsp. <i>anginosus</i> | 90  | 15 | 18 | 10 | 33 | 1  | 39 | 7  | G       |
| SH1597  | <i>S. anginosus</i> subsp. <i>anginosus</i> | 92  | 15 | 15 | 48 | 25 | 11 | 44 | 16 | G       |
| SH1800  | <i>S. anginosus</i> subsp. <i>anginosus</i> | 92  | 15 | 15 | 48 | 25 | 11 | 44 | 16 | G       |
| SH1814  | <i>S. anginosus</i> subsp. <i>anginosus</i> | 92  | 15 | 15 | 48 | 25 | 11 | 44 | 16 | G       |
| SH5264  | <i>S. anginosus</i> subsp. <i>anginosus</i> | 92  | 15 | 15 | 48 | 25 | 11 | 44 | 16 | G       |
| SH1609  | <i>S. anginosus</i> subsp. <i>anginosus</i> | 94  | 25 | 29 | 39 | 23 | 38 | 22 | 2  | G       |
| SH1752  | <i>S. anginosus</i> subsp. <i>anginosus</i> | 94  | 25 | 29 | 39 | 23 | 38 | 22 | 2  | G       |
| SH4252  | <i>S. anginosus</i> subsp. <i>anginosus</i> | 94  | 25 | 29 | 39 | 23 | 38 | 22 | 2  | G       |
| SH5112  | <i>S. anginosus</i> subsp. <i>anginosus</i> | 94  | 25 | 29 | 39 | 23 | 38 | 22 | 2  | G       |
| SH1614  | <i>S. anginosus</i> subsp. <i>anginosus</i> | 95  | 9  | 29 | 20 | 23 | 39 | 22 | 2  | G       |
| SH1757  | <i>S. anginosus</i> subsp. <i>anginosus</i> | 98  | 13 | 16 | 33 | 33 | 23 | 46 | 4  | G       |
| SH1785  | <i>S. anginosus</i> subsp. <i>anginosus</i> | 98  | 13 | 16 | 33 | 33 | 23 | 46 | 4  | G       |
| SH1758  | <i>S. anginosus</i> subsp. <i>anginosus</i> | 99  | 25 | 36 | 51 | 29 | 40 | 44 | 2  | G       |
| SH1770  | <i>S. anginosus</i> subsp. <i>anginosus</i> | 99  | 25 | 36 | 51 | 29 | 40 | 44 | 2  | G       |
| SH4927  | <i>S. anginosus</i> subsp. <i>anginosus</i> | 99  | 25 | 36 | 51 | 29 | 40 | 44 | 2  | G       |
| SH1768  | <i>S. anginosus</i> subsp. <i>anginosus</i> | 100 | 13 | 16 | 33 | 22 | 17 | 14 | 6  | G       |
| SH1773  | <i>S. anginosus</i> subsp. <i>anginosus</i> | 100 | 13 | 16 | 33 | 22 | 17 | 14 | 6  | G       |
| SH1772  | <i>S. anginosus</i> subsp. <i>anginosus</i> | 101 | 15 | 15 | 25 | 25 | 11 | 44 | 7  | G       |
| SH2182  | <i>S. anginosus</i> subsp. <i>anginosus</i> | 101 | 15 | 15 | 25 | 25 | 11 | 44 | 7  | G       |
| SH1279  | <i>S. anginosus</i> subsp. <i>anginosus</i> | 103 | 26 | 37 | 36 | 36 | 2  | 44 | 16 | G       |
| SH1543  | <i>S. anginosus</i> subsp. <i>anginosus</i> | 104 | 2  | 21 | 35 | 37 | 5  | 31 | 4  | G       |
| SH1796  | <i>S. anginosus</i> subsp. <i>anginosus</i> | 106 | 27 | 36 | 51 | 29 | 40 | 48 | 2  | G       |
| SH1871  | <i>S. anginosus</i> subsp. <i>anginosus</i> | 106 | 27 | 36 | 51 | 29 | 40 | 48 | 2  | G       |
| SH3418B | <i>S. anginosus</i> subsp. <i>anginosus</i> | 106 | 27 | 36 | 51 | 29 | 40 | 48 | 2  | G       |
| SH3887  | <i>S. anginosus</i> subsp. <i>anginosus</i> | 106 | 27 | 36 | 51 | 29 | 40 | 48 | 2  | G       |
| SH6260A | <i>S. anginosus</i> subsp. <i>anginosus</i> | 106 | 27 | 36 | 51 | 29 | 40 | 48 | 2  | G       |
| SH1623  | <i>S. anginosus</i> subsp. <i>anginosus</i> | 109 | 25 | 36 | 51 | 29 | 40 | 44 | 28 | G       |
| SH1802  | <i>S. anginosus</i> subsp. <i>anginosus</i> | 110 | 2  | 40 | 36 | 39 | 36 | 31 | 2  | G       |
| SH5331  | <i>S. anginosus</i> subsp. <i>anginosus</i> | 110 | 2  | 40 | 36 | 39 | 36 | 31 | 2  | G       |
| SH1829A | <i>S. anginosus</i> subsp. <i>anginosus</i> | 113 | 30 | 41 | 40 | 41 | 42 | 51 | 2  | G       |
| SH1754  | <i>S. anginosus</i> subsp. <i>anginosus</i> | 114 | 2  | 40 | 36 | 39 | 43 | 31 | 2  | G       |
| SH1779  | <i>S. anginosus</i> subsp. <i>anginosus</i> | 116 | 2  | 29 | 22 | 19 | 44 | 22 | 2  | G       |
| SH1801  | <i>S. anginosus</i> subsp. <i>anginosus</i> | 118 | 13 | 27 | 56 | 25 | 45 | 52 | 29 | G       |
| SH1819  | <i>S. anginosus</i> subsp. <i>anginosus</i> | 120 | 13 | 21 | 58 | 22 | 46 | 25 | 4  | G       |
| SH5965  | <i>S. anginosus</i> subsp. <i>anginosus</i> | 120 | 13 | 21 | 58 | 22 | 46 | 25 | 4  | G       |
| SH1828  | <i>S. anginosus</i> subsp. <i>anginosus</i> | 121 | 32 | 8  | 40 | 41 | 47 | 51 | 2  | G       |
| SH1852  | <i>S. anginosus</i> subsp. <i>anginosus</i> | 121 | 32 | 8  | 40 | 41 | 47 | 51 | 2  | G       |
| SH1973  | <i>S. anginosus</i> subsp. <i>anginosus</i> | 121 | 32 | 8  | 40 | 41 | 47 | 51 | 2  | G       |
| SH6257  | <i>S. anginosus</i> subsp. <i>anginosus</i> | 121 | 32 | 8  | 40 | 41 | 47 | 51 | 2  | G       |
| SH1834  | <i>S. anginosus</i> subsp. <i>anginosus</i> | 122 | 25 | 34 | 59 | 25 | 40 | 54 | 2  | G       |
| SH4306  | <i>S. anginosus</i> subsp. <i>anginosus</i> | 122 | 25 | 34 | 59 | 25 | 40 | 54 | 2  | G       |
| SH1840  | <i>S. anginosus</i> subsp. <i>anginosus</i> | 124 | 2  | 29 | 61 | 23 | 33 | 28 | 2  | G       |
| SH1831  | <i>S. anginosus</i> subsp. <i>anginosus</i> | 126 | 13 | 43 | 51 | 23 | 45 | 55 | 30 | G       |
| SH1855  | <i>S. anginosus</i> subsp. <i>anginosus</i> | 127 | 27 | 36 | 51 | 29 | 48 | 54 | 2  | G       |
| SH1847A | <i>S. anginosus</i> subsp. <i>anginosus</i> | 129 | 9  | 29 | 39 | 23 | 9  | 56 | 2  | G       |
| SH1866  | <i>S. anginosus</i> subsp. <i>anginosus</i> | 135 | 35 | 44 | 65 | 42 | 37 | 58 | 31 | G       |
| SH1898  | <i>S. anginosus</i> subsp. <i>anginosus</i> | 140 | 2  | 40 | 36 | 39 | 50 | 31 | 2  | G       |
| SH1944  | <i>S. anginosus</i> subsp. <i>anginosus</i> | 141 | 25 | 34 | 59 | 25 | 40 | 54 | 7  | G       |
| SH2184  | <i>S. anginosus</i> subsp. <i>anginosus</i> | 145 | 15 | 34 | 3  | 25 | 11 | 44 | 7  | G       |
| SH3693  | <i>S. anginosus</i> subsp. <i>anginosus</i> | 145 | 15 | 34 | 3  | 25 | 11 | 44 | 7  | G       |
| SH1949  | <i>S. anginosus</i> subsp. <i>anginosus</i> | 149 | 39 | 29 | 68 | 22 | 16 | 25 | 33 | G       |
| SH1985  | <i>S. anginosus</i> subsp. <i>anginosus</i> | 154 | 25 | 15 | 3  | 44 | 53 | 44 | 7  | G       |
| SH2163  | <i>S. anginosus</i> subsp. <i>anginosus</i> | 155 | 40 | 34 | 71 | 9  | 40 | 63 | 7  | outlier |
| SH2316  | <i>S. anginosus</i> subsp. <i>anginosus</i> | 156 | 15 | 47 | 26 | 29 | 40 | 64 | 7  | G       |
| SH3423  | <i>S. anginosus</i> subsp. <i>anginosus</i> | 159 | 2  | 48 | 20 | 45 | 9  | 31 | 2  | G       |
| SH2373  | <i>S. anginosus</i> subsp. <i>anginosus</i> | 163 | 13 | 43 | 73 | 46 | 56 | 66 | 10 | G       |
| SH3036  | <i>S. anginosus</i> subsp. <i>anginosus</i> | 164 | 41 | 12 | 21 | 5  | 57 | 64 | 5  | G       |
| SH3044  | <i>S. anginosus</i> subsp. <i>anginosus</i> | 169 | 13 | 16 | 33 | 33 | 23 | 14 | 4  | G       |
| SH3372  | <i>S. anginosus</i> subsp. <i>anginosus</i> | 170 | 11 | 12 | 21 | 5  | 35 | 68 | 5  | G       |
| SH4263  | <i>S. anginosus</i> subsp. <i>anginosus</i> | 170 | 11 | 12 | 21 | 5  | 35 | 68 | 5  | G       |
| SH3598  | <i>S. anginosus</i> subsp. <i>anginosus</i> | 172 | 11 | 12 | 21 | 5  | 60 | 13 | 5  | G       |
| SH3890  | <i>S. anginosus</i> subsp. <i>anginosus</i> | 176 | 15 | 15 | 80 | 47 | 62 | 70 | 7  | G       |
| SH3894  | <i>S. anginosus</i> subsp. <i>anginosus</i> | 177 | 43 | 29 | 81 | 22 | 63 | 71 | 2  | G       |
| SH3966  | <i>S. anginosus</i> subsp. <i>anginosus</i> | 178 | 11 | 5  | 21 | 5  | 35 | 13 | 5  | G       |
| SH5262  | <i>S. anginosus</i> subsp. <i>anginosus</i> | 181 | 8  | 16 | 10 | 33 | 1  | 39 | 7  | G       |

|         |                                                   |     |    |    |    |    |    |    |    |   |
|---------|---------------------------------------------------|-----|----|----|----|----|----|----|----|---|
| SH5363  | <i>S. anginosus</i> subsp. <i>anginosus</i>       | 184 | 13 | 34 | 47 | 48 | 37 | 73 | 25 | G |
| SH5364  | <i>S. anginosus</i> subsp. <i>anginosus</i>       | 184 | 13 | 34 | 47 | 48 | 37 | 73 | 25 | G |
| SH5871  | <i>S. anginosus</i> subsp. <i>anginosus</i>       | 187 | 2  | 29 | 39 | 23 | 33 | 22 | 2  | G |
| SH5998  | <i>S. anginosus</i> subsp. <i>anginosus</i>       | 189 | 11 | 50 | 21 | 5  | 13 | 13 | 5  | G |
| SH6190  | <i>S. anginosus</i> subsp. <i>anginosus</i>       | 190 | 13 | 15 | 33 | 22 | 66 | 18 | 4  | G |
| SH6252  | <i>S. anginosus</i> subsp. <i>anginosus</i>       | 192 | 46 | 51 | 51 | 29 | 17 | 48 | 2  | G |
| SH6263  | <i>S. anginosus</i> subsp. <i>anginosus</i>       | 194 | 47 | 52 | 83 | 50 | 37 | 39 | 16 | G |
| SH4253  | <i>S. anginosus</i> subsp. <i>anginosus</i>       | 195 | 14 | 34 | 84 | 25 | 68 | 76 | 31 | G |
| SH4254  | <i>S. anginosus</i> subsp. <i>anginosus</i>       | 196 | 48 | 15 | 3  | 51 | 57 | 77 | 36 | G |
| SH4302  | <i>S. anginosus</i> subsp. <i>anginosus</i>       | 197 | 15 | 43 | 40 | 25 | 45 | 63 | 2  | G |
| SH4486A | <i>S. anginosus</i> subsp. <i>anginosus</i>       | 199 | 49 | 5  | 21 | 52 | 35 | 44 | 25 | G |
| SH4792  | <i>S. anginosus</i> subsp. <i>anginosus</i>       | 202 | 50 | 54 | 86 | 22 | 36 | 79 | 20 | G |
| SH4928  | <i>S. anginosus</i> subsp. <i>anginosus</i>       | 203 | 21 | 14 | 40 | 33 | 16 | 22 | 38 | G |
| SH6183  | <i>S. anginosus</i> subsp. <i>anginosus</i>       | 211 | 14 | 34 | 71 | 53 | 40 | 63 | 7  | G |
| SH6265  | <i>S. anginosus</i> subsp. <i>anginosus</i>       | 213 | 13 | 16 | 33 | 33 | 23 | 22 | 4  | G |
| SH1559  | <i>S. anginosus</i> subsp. <i>whileyi</i>         | 27  | 14 | 30 | 3  | 3  | 27 | 4  | 5  | F |
| SH5158  | <i>S. anginosus</i> subsp. <i>whileyi</i>         | 27  | 14 | 30 | 3  | 3  | 27 | 4  | 5  | F |
| SH5974  | <i>S. anginosus</i> subsp. <i>whileyi</i>         | 27  | 14 | 30 | 3  | 3  | 27 | 4  | 5  | F |
| SH6266  | <i>S. anginosus</i> subsp. <i>whileyi</i>         | 27  | 14 | 30 | 3  | 3  | 27 | 4  | 5  | F |
| SH4675  | <i>S. anginosus</i> subsp. <i>whileyi</i>         | 200 | 14 | 30 | 3  | 3  | 27 | 4  | 37 | F |
| SH5102  | <i>S. constellatus</i> subsp. <i>constellatus</i> | 34  | 14 | 30 | 8  | 10 | 32 | 34 | 10 | B |
| SH0350  | <i>S. constellatus</i> subsp. <i>constellatus</i> | 79  | 14 | 31 | 1  | 32 | 32 | 40 | 10 | A |
| SH0859  | <i>S. constellatus</i> subsp. <i>constellatus</i> | 80  | 22 | 27 | 43 | 35 | 34 | 5  | 24 | A |
| SH1049  | <i>S. constellatus</i> subsp. <i>constellatus</i> | 81  | 15 | 27 | 44 | 32 | 29 | 24 | 10 | A |
| SH1551  | <i>S. constellatus</i> subsp. <i>constellatus</i> | 83  | 14 | 32 | 8  | 32 | 21 | 41 | 10 | A |
| SH1574  | <i>S. constellatus</i> subsp. <i>constellatus</i> | 86  | 15 | 30 | 46 | 9  | 25 | 11 | 10 | A |
| SH1593  | <i>S. constellatus</i> subsp. <i>constellatus</i> | 89  | 19 | 20 | 6  | 31 | 19 | 35 | 8  | B |
| SH0358  | <i>S. constellatus</i> subsp. <i>constellatus</i> | 91  | 24 | 27 | 43 | 35 | 34 | 5  | 13 | A |
| SH1599  | <i>S. constellatus</i> subsp. <i>constellatus</i> | 93  | 15 | 27 | 43 | 35 | 34 | 45 | 13 | A |
| SH1622  | <i>S. constellatus</i> subsp. <i>constellatus</i> | 96  | 14 | 35 | 49 | 32 | 32 | 6  | 26 | A |
| SH1635  | <i>S. constellatus</i> subsp. <i>constellatus</i> | 97  | 15 | 20 | 50 | 13 | 25 | 5  | 10 | A |
| SH1048  | <i>S. constellatus</i> subsp. <i>constellatus</i> | 102 | 15 | 1  | 1  | 32 | 25 | 5  | 10 | A |
| SH1546  | <i>S. constellatus</i> subsp. <i>constellatus</i> | 105 | 14 | 27 | 8  | 9  | 25 | 47 | 2  | A |
| SH1797  | <i>S. constellatus</i> subsp. <i>constellatus</i> | 107 | 15 | 38 | 52 | 9  | 25 | 5  | 10 | A |
| SH1813  | <i>S. constellatus</i> subsp. <i>constellatus</i> | 111 | 28 | 30 | 54 | 40 | 25 | 50 | 10 | A |
| SH1817  | <i>S. constellatus</i> subsp. <i>constellatus</i> | 112 | 29 | 30 | 8  | 10 | 25 | 37 | 10 | A |
| SH1756  | <i>S. constellatus</i> subsp. <i>constellatus</i> | 115 | 14 | 42 | 1  | 32 | 25 | 5  | 8  | A |
| SH4498  | <i>S. constellatus</i> subsp. <i>constellatus</i> | 115 | 14 | 42 | 1  | 32 | 25 | 5  | 8  | A |
| SH6032  | <i>S. constellatus</i> subsp. <i>constellatus</i> | 115 | 14 | 42 | 1  | 32 | 25 | 5  | 8  | A |
| SH1794  | <i>S. constellatus</i> subsp. <i>constellatus</i> | 117 | 7  | 27 | 55 | 32 | 29 | 19 | 10 | A |
| SH1810  | <i>S. constellatus</i> subsp. <i>constellatus</i> | 119 | 31 | 27 | 57 | 14 | 32 | 53 | 10 | D |
| SH1838  | <i>S. constellatus</i> subsp. <i>constellatus</i> | 123 | 33 | 27 | 60 | 9  | 25 | 30 | 8  | A |
| SH1829C | <i>S. constellatus</i> subsp. <i>constellatus</i> | 125 | 14 | 17 | 62 | 32 | 32 | 37 | 10 | A |
| SH2376  | <i>S. constellatus</i> subsp. <i>constellatus</i> | 125 | 14 | 17 | 62 | 32 | 32 | 37 | 10 | A |
| SH1865  | <i>S. constellatus</i> subsp. <i>constellatus</i> | 128 | 14 | 27 | 1  | 32 | 32 | 37 | 10 | A |
| SH5119  | <i>S. constellatus</i> subsp. <i>constellatus</i> | 128 | 14 | 27 | 1  | 32 | 32 | 37 | 10 | A |
| SH5517  | <i>S. constellatus</i> subsp. <i>constellatus</i> | 128 | 14 | 27 | 1  | 32 | 32 | 37 | 10 | A |
| SH5953  | <i>S. constellatus</i> subsp. <i>constellatus</i> | 128 | 14 | 27 | 1  | 32 | 32 | 37 | 10 | A |
| SH1847B | <i>S. constellatus</i> subsp. <i>constellatus</i> | 130 | 15 | 27 | 11 | 14 | 25 | 11 | 7  | A |
| SH1849  | <i>S. constellatus</i> subsp. <i>constellatus</i> | 131 | 14 | 30 | 49 | 32 | 25 | 6  | 8  | A |
| SH1881  | <i>S. constellatus</i> subsp. <i>constellatus</i> | 132 | 14 | 30 | 49 | 32 | 25 | 6  | 26 | A |
| SH1895A | <i>S. constellatus</i> subsp. <i>constellatus</i> | 133 | 14 | 27 | 63 | 32 | 25 | 57 | 10 | A |
| SH1850  | <i>S. constellatus</i> subsp. <i>constellatus</i> | 134 | 34 | 30 | 64 | 40 | 28 | 37 | 10 | A |
| SH1876  | <i>S. constellatus</i> subsp. <i>constellatus</i> | 136 | 14 | 30 | 66 | 9  | 25 | 37 | 10 | A |
| SH1958  | <i>S. constellatus</i> subsp. <i>constellatus</i> | 137 | 15 | 27 | 52 | 9  | 25 | 11 | 7  | A |
| SH5101  | <i>S. constellatus</i> subsp. <i>constellatus</i> | 137 | 15 | 27 | 52 | 9  | 25 | 11 | 7  | A |
| SH1964  | <i>S. constellatus</i> subsp. <i>constellatus</i> | 138 | 36 | 27 | 8  | 9  | 49 | 37 | 10 | A |
| SH1969  | <i>S. constellatus</i> subsp. <i>constellatus</i> | 139 | 14 | 27 | 8  | 10 | 25 | 7  | 13 | A |
| SH1984  | <i>S. constellatus</i> subsp. <i>constellatus</i> | 143 | 14 | 27 | 1  | 32 | 51 | 60 | 10 | A |
| SH3043  | <i>S. constellatus</i> subsp. <i>constellatus</i> | 146 | 14 | 15 | 54 | 32 | 25 | 37 | 10 | A |
| SH3045  | <i>S. constellatus</i> subsp. <i>constellatus</i> | 147 | 14 | 27 | 1  | 40 | 22 | 6  | 32 | A |
| SH1946  | <i>S. constellatus</i> subsp. <i>constellatus</i> | 148 | 38 | 46 | 1  | 32 | 25 | 62 | 8  | A |
| SH1963  | <i>S. constellatus</i> subsp. <i>constellatus</i> | 150 | 18 | 20 | 8  | 31 | 19 | 35 | 10 | B |
| SH3415  | <i>S. constellatus</i> subsp. <i>constellatus</i> | 150 | 18 | 20 | 8  | 31 | 19 | 35 | 10 | B |
| SH5109  | <i>S. constellatus</i> subsp. <i>constellatus</i> | 150 | 18 | 20 | 8  | 31 | 19 | 35 | 10 | B |
| SH1974  | <i>S. constellatus</i> subsp. <i>constellatus</i> | 151 | 19 | 20 | 69 | 31 | 19 | 35 | 34 | B |
| SH1977  | <i>S. constellatus</i> subsp. <i>constellatus</i> | 152 | 19 | 20 | 62 | 31 | 19 | 35 | 10 | B |
| SH3413  | <i>S. constellatus</i> subsp. <i>constellatus</i> | 153 | 15 | 1  | 70 | 8  | 32 | 40 | 10 | A |
| SH5635  | <i>S. constellatus</i> subsp. <i>constellatus</i> | 153 | 15 | 1  | 70 | 8  | 32 | 40 | 10 | A |
| SH2368  | <i>S. constellatus</i> subsp. <i>constellatus</i> | 157 | 14 | 27 | 72 | 9  | 54 | 65 | 2  | A |

|         |                                                   |     |    |    |    |    |    |    |    |         |
|---------|---------------------------------------------------|-----|----|----|----|----|----|----|----|---------|
| SH3416  | <i>S. constellatus</i> subsp. <i>constellatus</i> | 158 | 15 | 30 | 8  | 10 | 25 | 37 | 34 | A       |
| SH3691  | <i>S. constellatus</i> subsp. <i>constellatus</i> | 160 | 14 | 26 | 41 | 32 | 32 | 24 | 8  | A       |
| SH3884  | <i>S. constellatus</i> subsp. <i>constellatus</i> | 161 | 14 | 27 | 60 | 32 | 51 | 29 | 10 | A       |
| SH3897  | <i>S. constellatus</i> subsp. <i>constellatus</i> | 162 | 15 | 30 | 8  | 9  | 55 | 37 | 35 | A       |
| SH4233  | <i>S. constellatus</i> subsp. <i>constellatus</i> | 165 | 14 | 30 | 74 | 14 | 58 | 7  | 10 | A       |
| SH4788  | <i>S. constellatus</i> subsp. <i>constellatus</i> | 167 | 14 | 49 | 76 | 32 | 15 | 37 | 10 | outlier |
| SH4800  | <i>S. constellatus</i> subsp. <i>constellatus</i> | 174 | 14 | 30 | 78 | 32 | 32 | 69 | 10 | A       |
| SH4805  | <i>S. constellatus</i> subsp. <i>constellatus</i> | 175 | 14 | 30 | 79 | 32 | 25 | 69 | 10 | A       |
| SH5359  | <i>S. constellatus</i> subsp. <i>constellatus</i> | 175 | 14 | 30 | 79 | 32 | 25 | 69 | 10 | A       |
| SH5113  | <i>S. constellatus</i> subsp. <i>constellatus</i> | 179 | 14 | 27 | 8  | 32 | 28 | 11 | 10 | A       |
| SH5114  | <i>S. constellatus</i> subsp. <i>constellatus</i> | 180 | 31 | 27 | 11 | 14 | 32 | 53 | 10 | D       |
| SH5136  | <i>S. constellatus</i> subsp. <i>constellatus</i> | 180 | 31 | 27 | 11 | 14 | 32 | 53 | 10 | D       |
| SH5266  | <i>S. constellatus</i> subsp. <i>constellatus</i> | 182 | 15 | 1  | 8  | 32 | 29 | 24 | 10 | A       |
| SH5680  | <i>S. constellatus</i> subsp. <i>constellatus</i> | 186 | 45 | 27 | 43 | 35 | 29 | 5  | 13 | A       |
| SH5977  | <i>S. constellatus</i> subsp. <i>constellatus</i> | 188 | 14 | 27 | 54 | 49 | 32 | 37 | 13 | A       |
| SH6193  | <i>S. constellatus</i> subsp. <i>constellatus</i> | 191 | 15 | 27 | 8  | 32 | 25 | 74 | 13 | A       |
| SH6262  | <i>S. constellatus</i> subsp. <i>constellatus</i> | 193 | 7  | 30 | 82 | 32 | 67 | 75 | 10 | A       |
| SH4321  | <i>S. constellatus</i> subsp. <i>constellatus</i> | 198 | 14 | 15 | 54 | 32 | 25 | 35 | 10 | B       |
| SH4778  | <i>S. constellatus</i> subsp. <i>constellatus</i> | 201 | 15 | 53 | 85 | 9  | 25 | 78 | 8  | A       |
| SH5116  | <i>S. constellatus</i> subsp. <i>constellatus</i> | 204 | 14 | 27 | 63 | 32 | 25 | 69 | 10 | A       |
| SH5525A | <i>S. constellatus</i> subsp. <i>constellatus</i> | 205 | 51 | 20 | 87 | 32 | 28 | 80 | 8  | A       |
| SH5553  | <i>S. constellatus</i> subsp. <i>constellatus</i> | 206 | 7  | 27 | 62 | 9  | 28 | 11 | 23 | A       |
| SH5952  | <i>S. constellatus</i> subsp. <i>constellatus</i> | 207 | 15 | 27 | 8  | 32 | 29 | 80 | 10 | A       |
| SH6031  | <i>S. constellatus</i> subsp. <i>constellatus</i> | 208 | 15 | 55 | 8  | 9  | 29 | 24 | 10 | A       |
| SH6175  | <i>S. constellatus</i> subsp. <i>constellatus</i> | 209 | 52 | 27 | 54 | 40 | 25 | 81 | 5  | A       |
| SH6178  | <i>S. constellatus</i> subsp. <i>constellatus</i> | 210 | 15 | 20 | 1  | 9  | 25 | 5  | 10 | A       |
| SH3634  | <i>S. constellatus</i> subsp. <i>pharyngis</i>    | 173 | 14 | 27 | 16 | 32 | 61 | 37 | 17 | C       |
| SH6194  | <i>S. constellatus</i> subsp. <i>pharyngis</i>    | 212 | 53 | 56 | 88 | 32 | 25 | 37 | 17 | C       |
| SH1544  | <i>S. constellatus</i> subsp. <i>viborgenesis</i> | 31  | 14 | 30 | 38 | 32 | 25 | 20 | 17 | E       |
| SH1845B | <i>S. constellatus</i> subsp. <i>viborgenesis</i> | 31  | 14 | 30 | 38 | 32 | 25 | 20 | 17 | E       |
| SH4165  | <i>S. constellatus</i> subsp. <i>viborgenesis</i> | 31  | 14 | 30 | 38 | 32 | 25 | 20 | 17 | E       |
| SH4349  | <i>S. constellatus</i> subsp. <i>viborgenesis</i> | 31  | 14 | 30 | 38 | 32 | 25 | 20 | 17 | E       |
| SH6198  | <i>S. constellatus</i> subsp. <i>viborgenesis</i> | 31  | 14 | 30 | 38 | 32 | 25 | 20 | 17 | E       |
| SH3396  | <i>S. constellatus</i> subsp. <i>viborgenesis</i> | 171 | 14 | 30 | 38 | 32 | 59 | 20 | 17 | E       |
| SH1607  | <i>S. intermedius</i>                             | 108 | 20 | 39 | 53 | 38 | 41 | 49 | 27 | H       |
| SH1975  | <i>S. intermedius</i>                             | 142 | 20 | 39 | 53 | 38 | 41 | 59 | 12 | H       |
| SH2172  | <i>S. intermedius</i>                             | 144 | 37 | 45 | 67 | 43 | 52 | 61 | 22 | H       |
| SH4251  | <i>S. intermedius</i>                             | 166 | 42 | 39 | 75 | 11 | 41 | 67 | 12 | H       |
| SH3038  | <i>S. intermedius</i>                             | 168 | 4  | 10 | 77 | 1  | 41 | 12 | 11 | H       |
| SH5267  | <i>S. intermedius</i>                             | 183 | 44 | 10 | 27 | 22 | 64 | 72 | 18 | H       |
| SH5554  | <i>S. intermedius</i>                             | 185 | 20 | 13 | 27 | 11 | 65 | 1  | 22 | H       |

<sup>a</sup> - The clusters were given arbitrary letters (see figure 1).

## Supplementary Figure S1

Supplementary Figures S1a-g - Minimum evolution trees based on the individual housekeeping genes found among the 212 STs of study collection in addition to the alleles available on GenBank. The alleles are colored according to the *taxa*, with the same colors used in Figure 1. Alleles present in more than one *taxon* are marked with the corresponding colors independently of their proportion in each *taxon*. Bootstrap values (percentages) are shown and ❖ indicates the allele found in the type strain.

Figure S1a - map

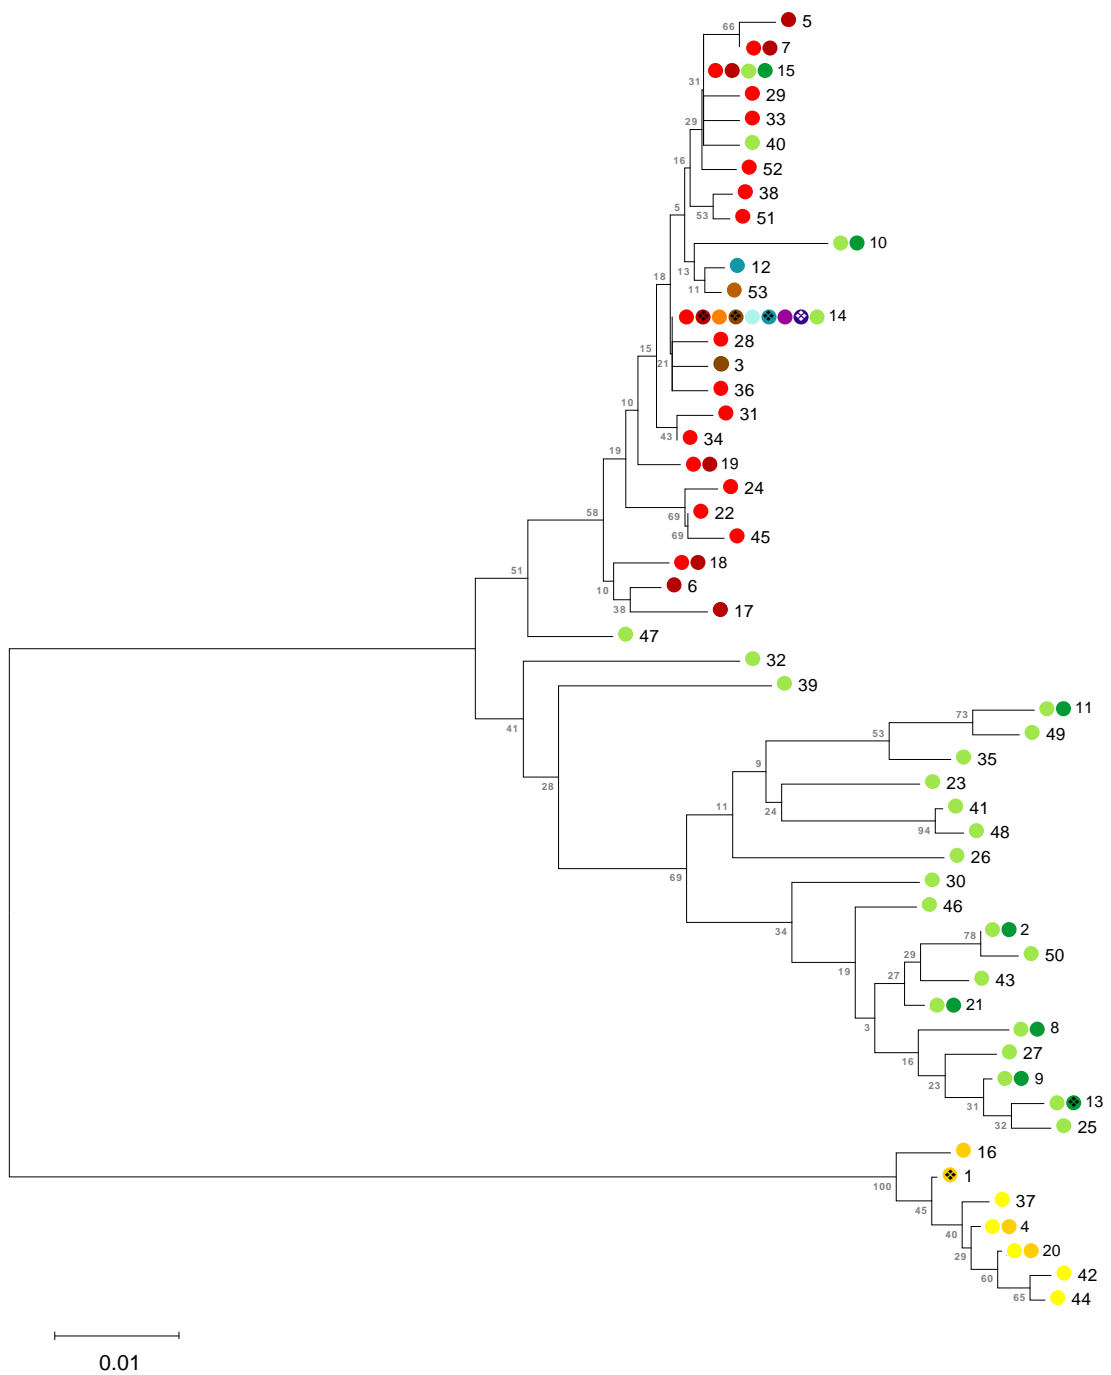

Figure S1b - *pfl*

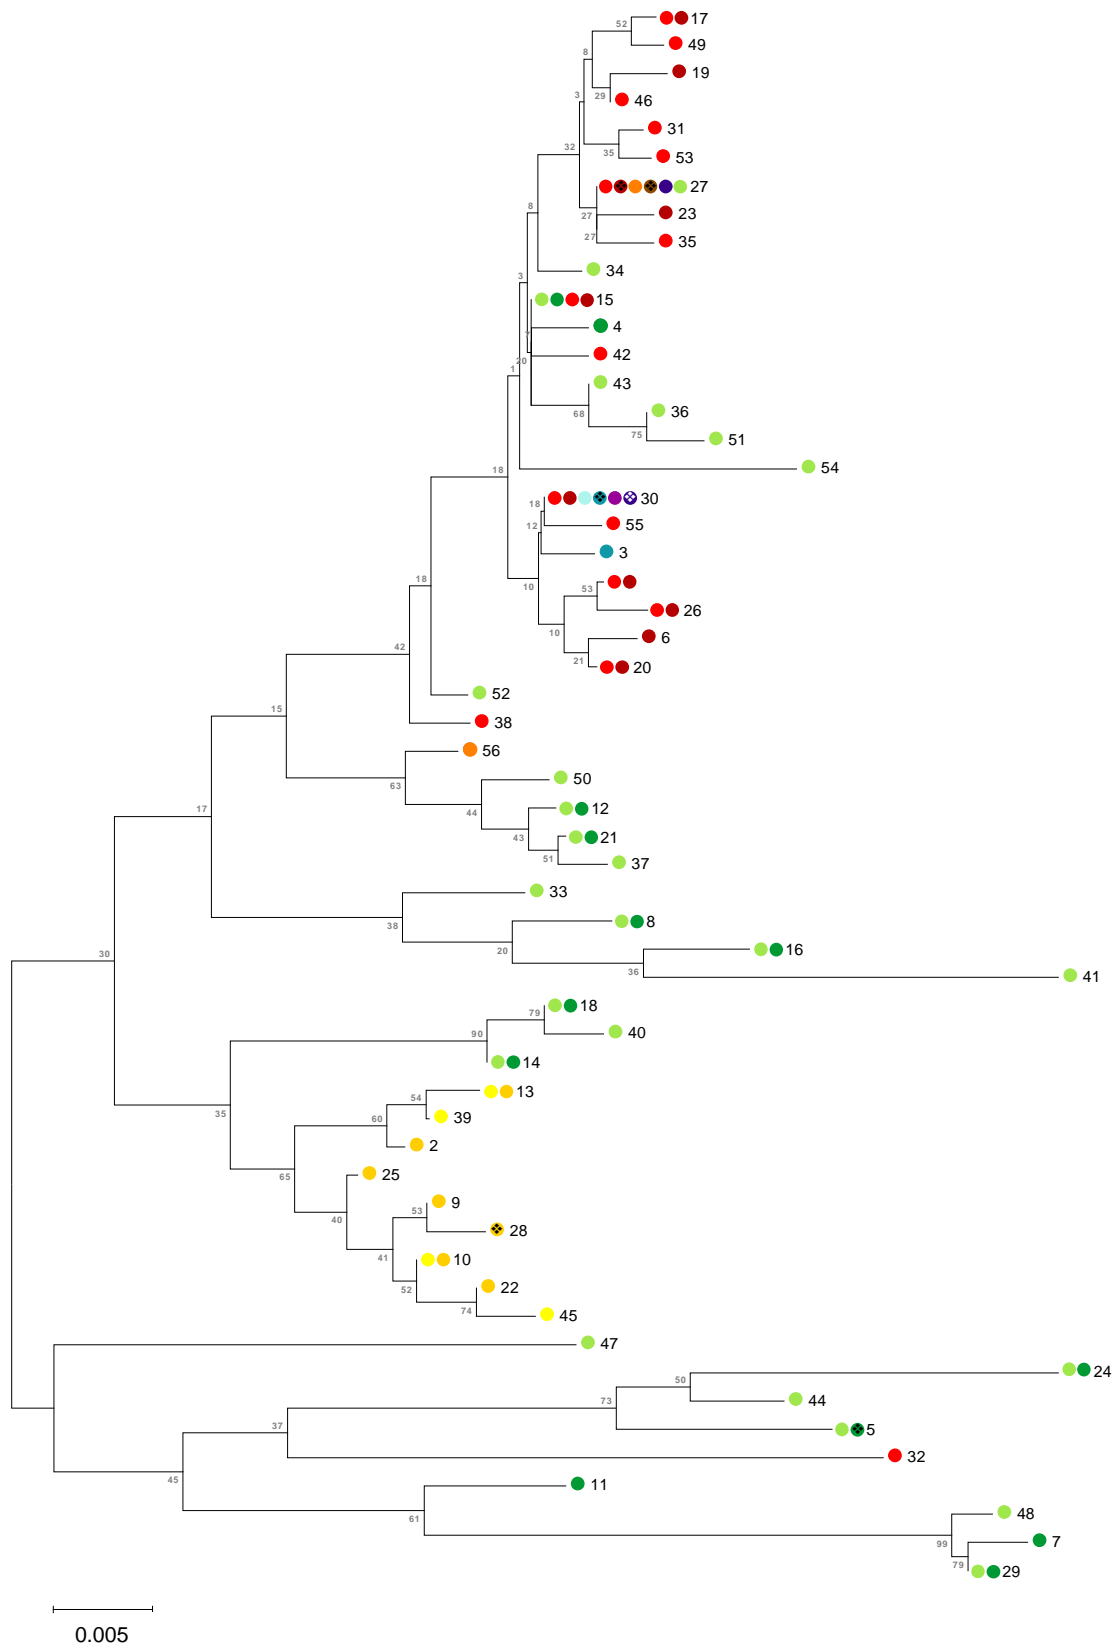



Figure S1c - *ppac*

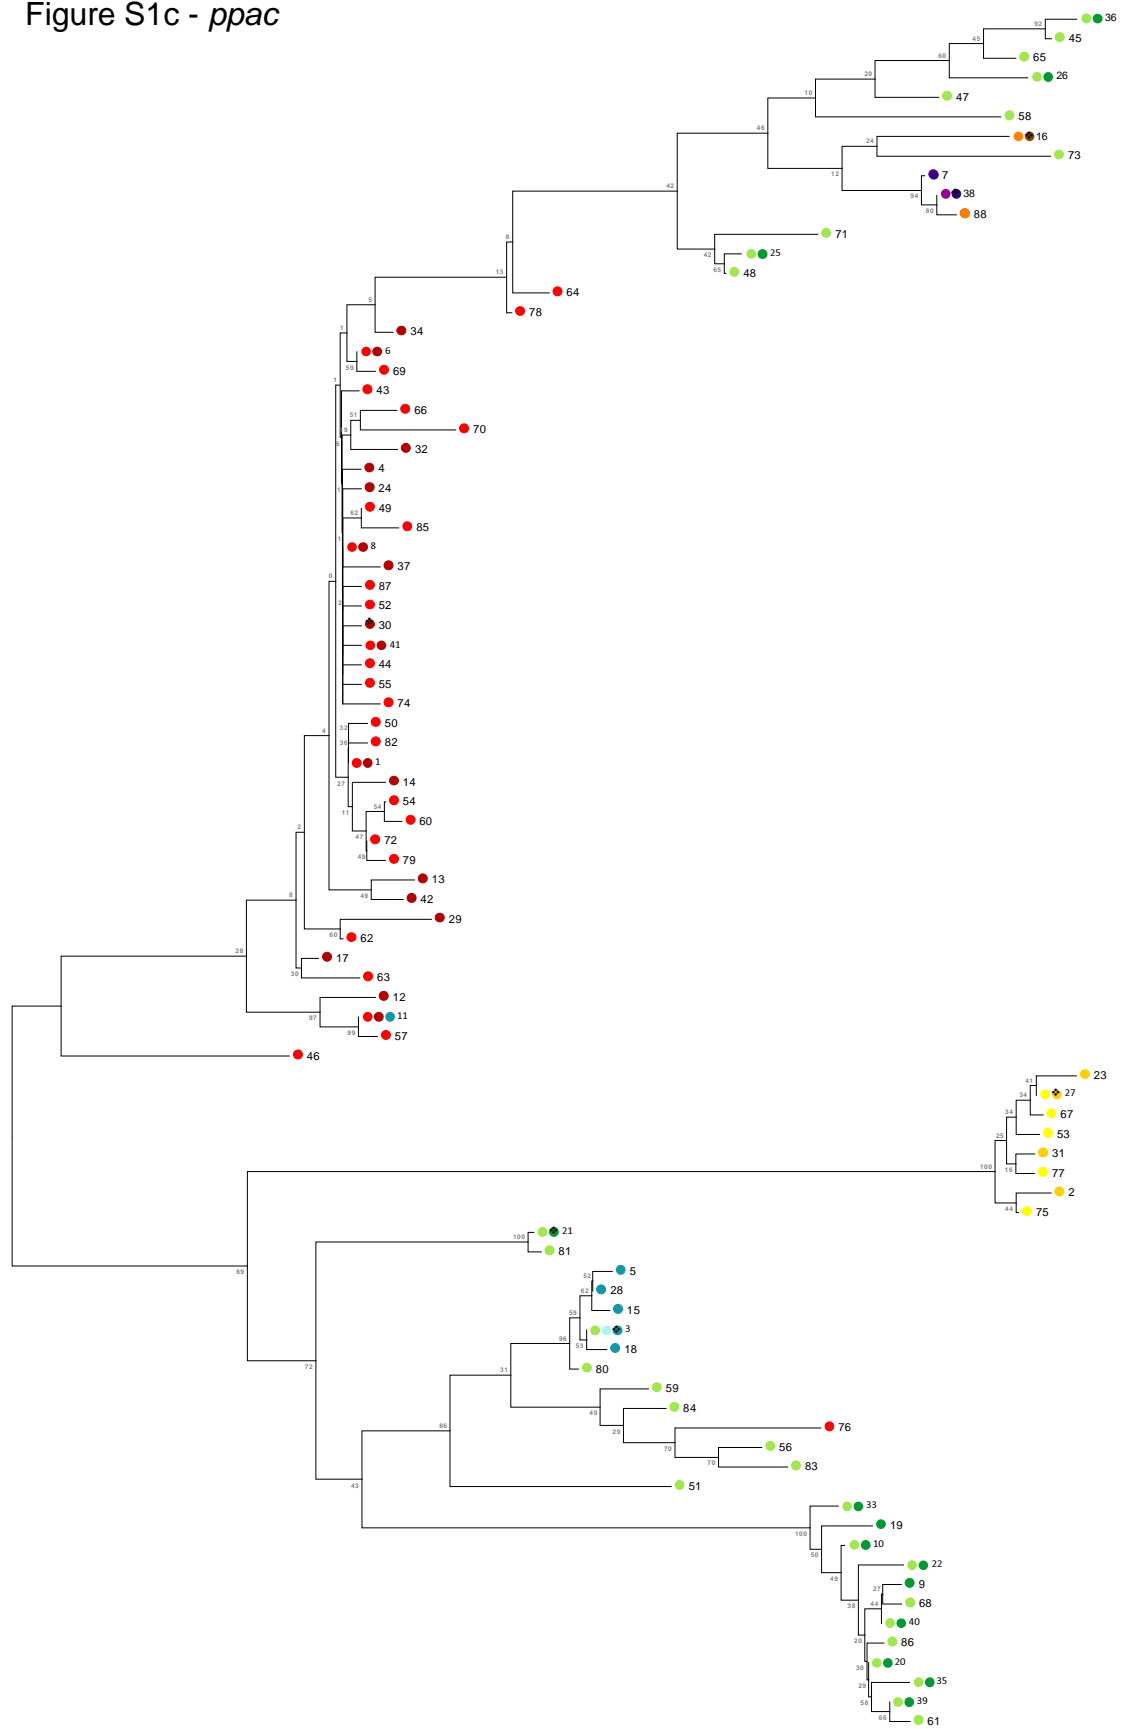

0.01

Figure S1d - *pyk*

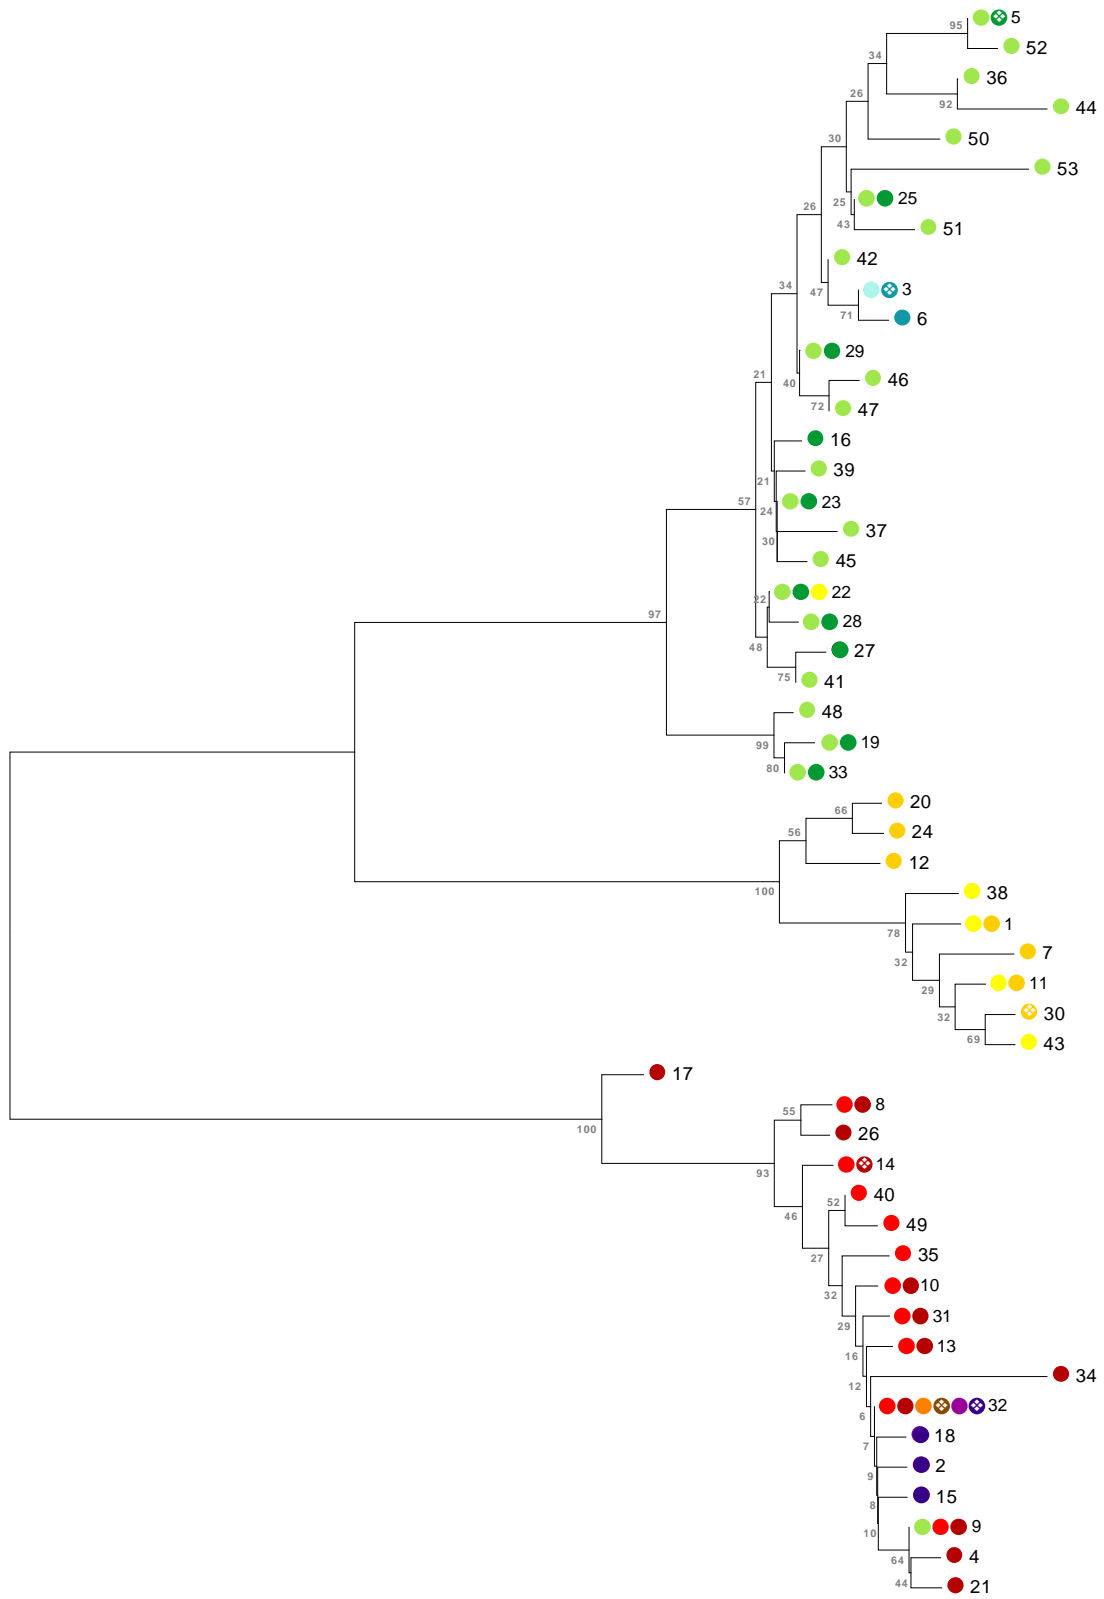

Figure S1e - *rpoB*

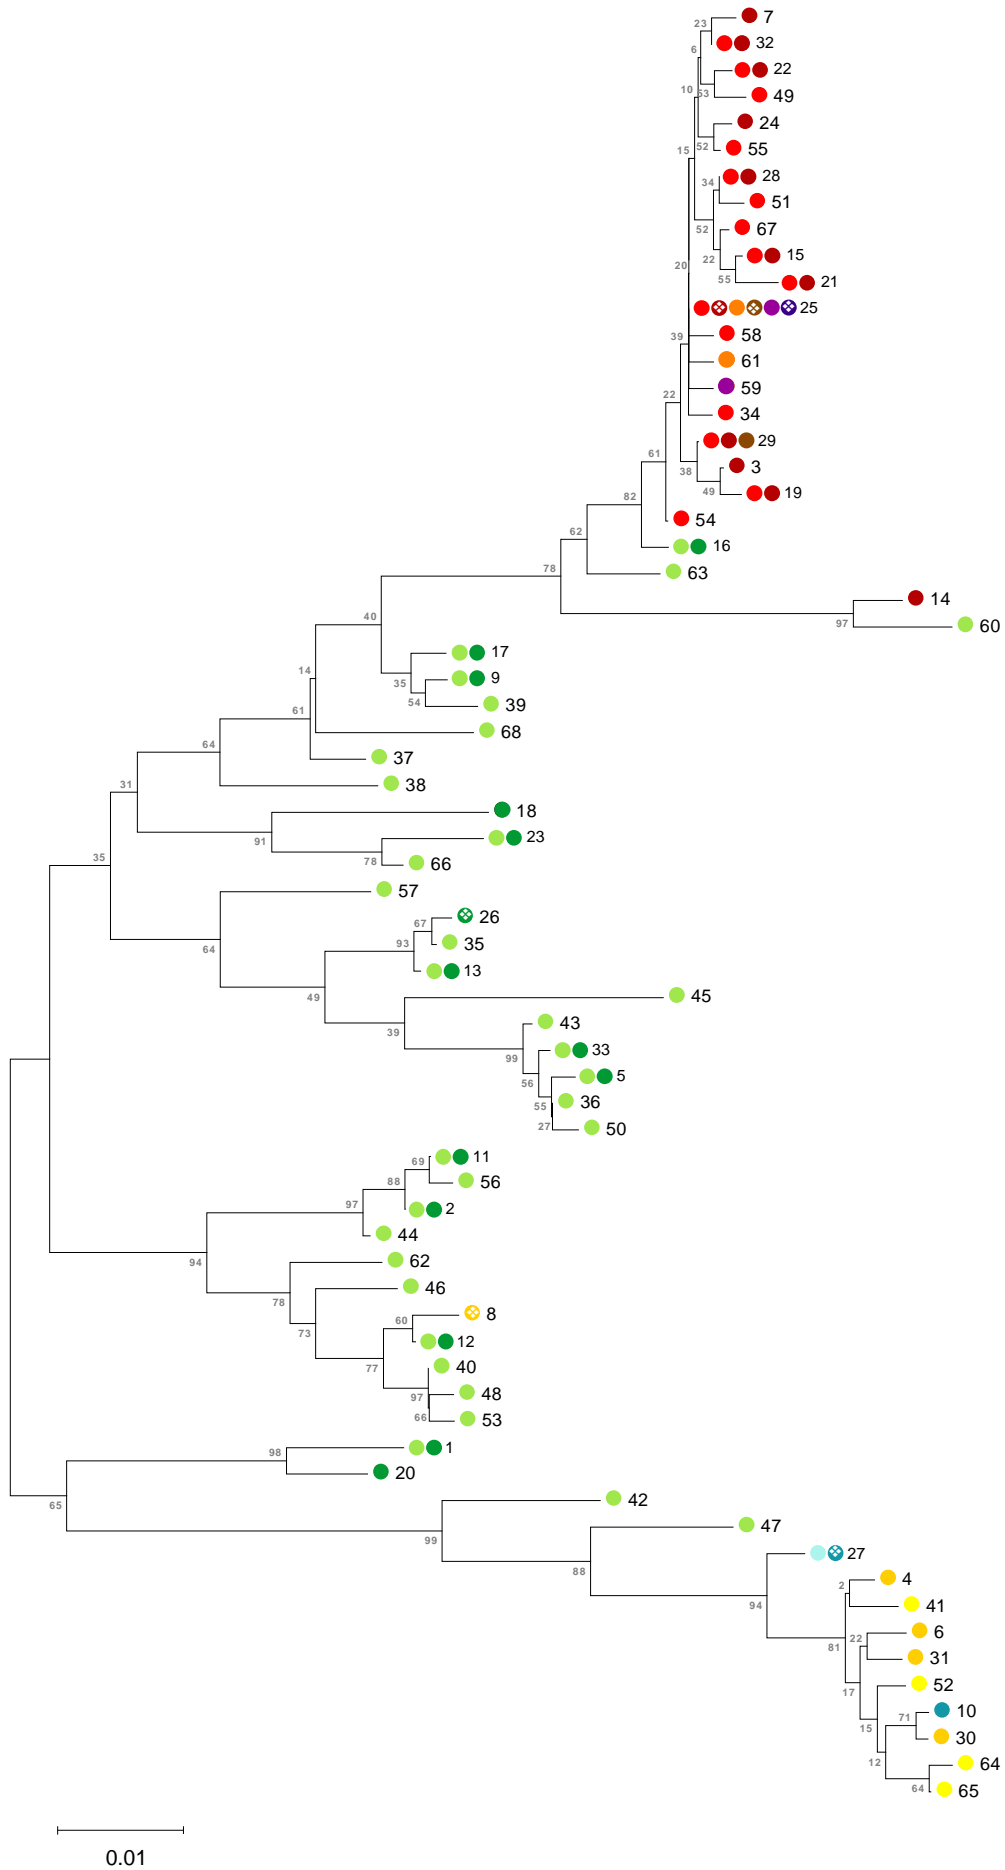

Figure S1f - *sodA*

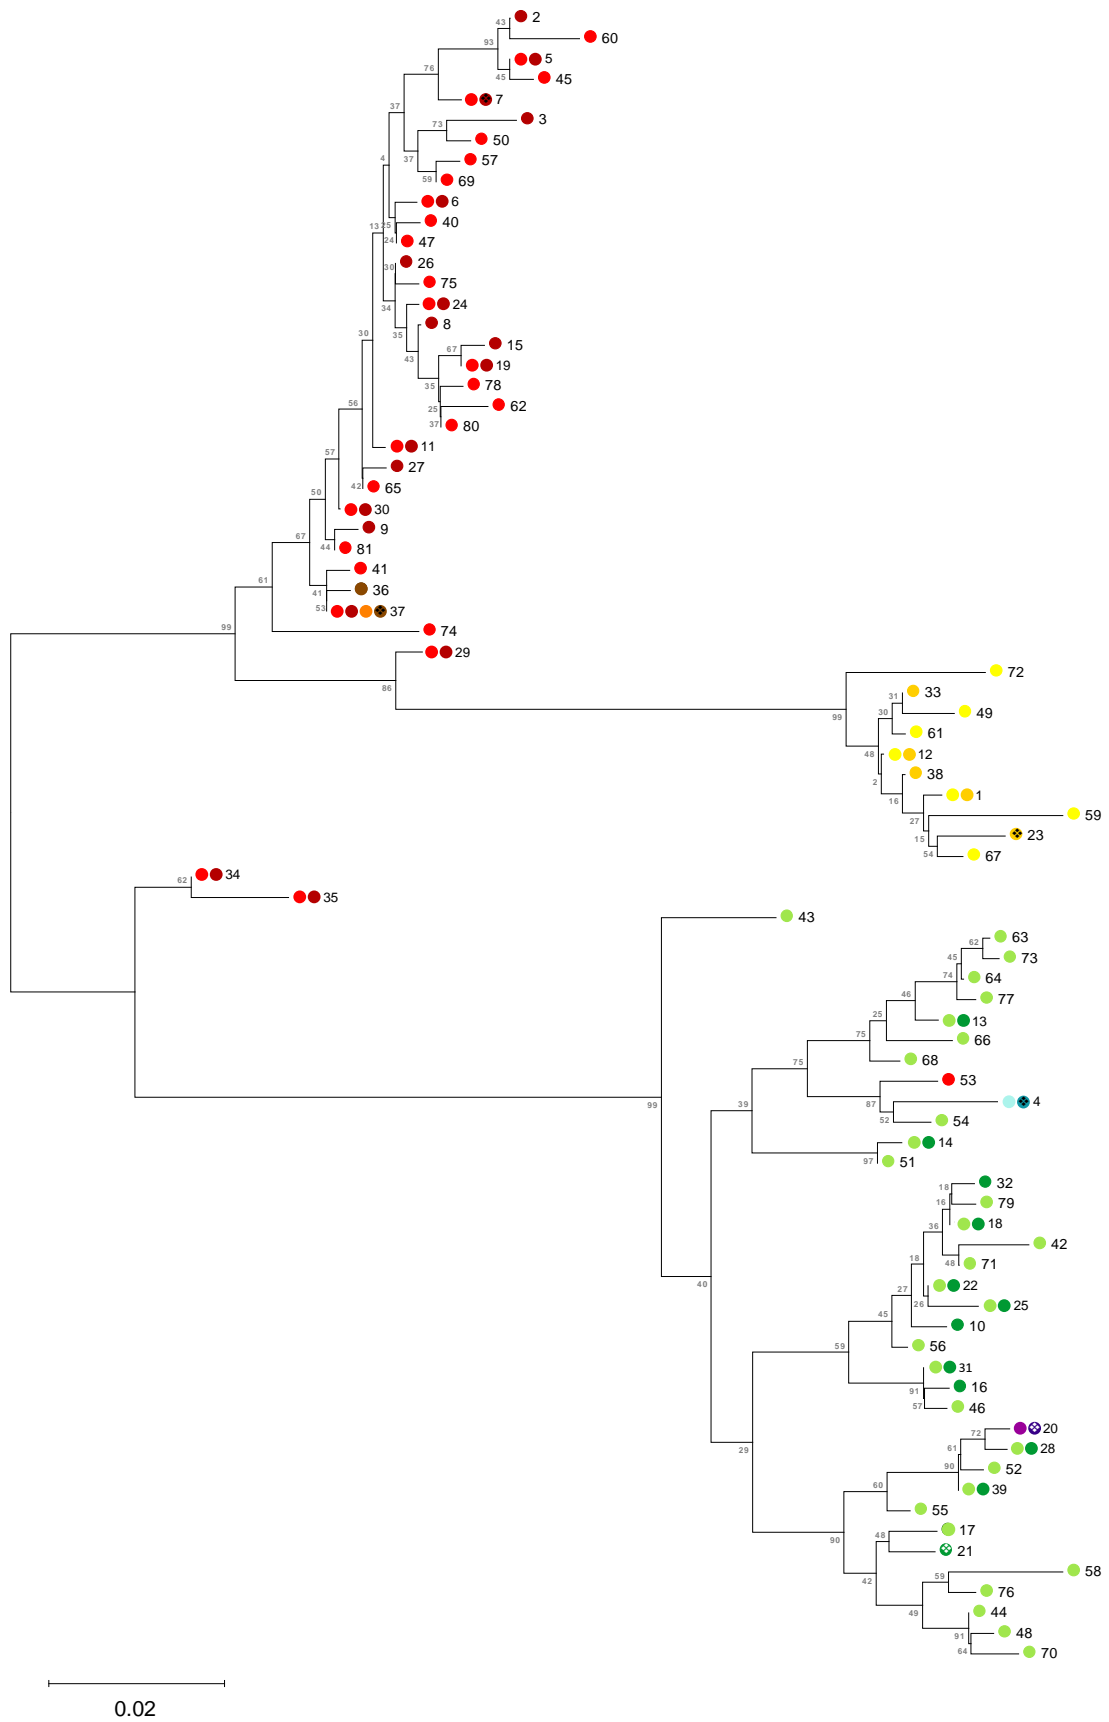

Figure S1g - *tuf*

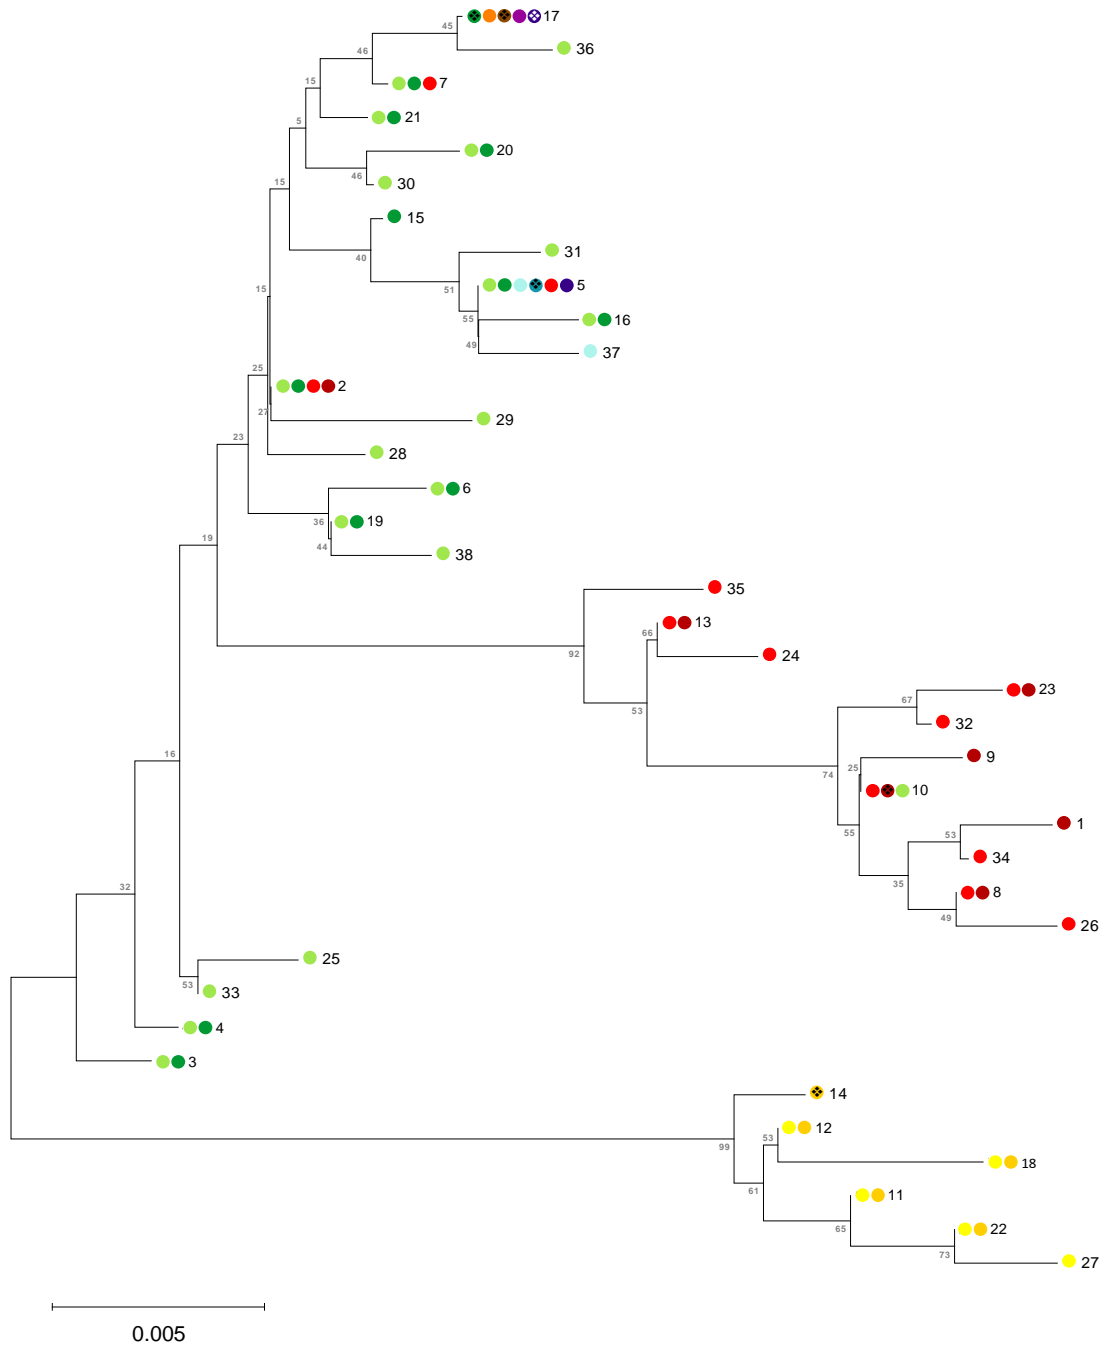

Supplement: JCM.01892-15_zjm999094596so1.pdf [file JCM.01892-15_zjm999094596so1.pdf]
